RESEARCH ARTICLE

# miR-599 Inhibits Vascular Smooth Muscle Cells Proliferation and Migration by Targeting TGFB2

Baodong Xie<sup>‡</sup>, Chunfeng Zhang<sup>‡</sup>, Kai Kang<sup>\*</sup>, Shulin Jiang<sup>\*</sup>

Department of Cardiovascular Surgery, the Second Affiliated Hospital of Harbin Medical University, Harbin, Heilongjiang, China

<sup>‡</sup> BaodongXie and Chunfeng Zhang are co-first authors on this work.

<sup>\*</sup> [kai1kang@sina.com](mailto:kai1kang@sina.com) (KK); [jiangshulin@aliyun.com](mailto:jiangshulin@aliyun.com) (SJ)

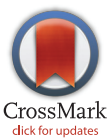

**OPEN ACCESS**

**Citation:** Xie B, Zhang C, Kang K, Jiang S (2015) miR-599 Inhibits Vascular Smooth Muscle Cells Proliferation and Migration by Targeting TGFB2. PLoS ONE 10(11): e0141512. doi:10.1371/journal.pone.0141512

**Editor:** Zheng Li, Peking Union Medical College Hospital, CHINA

**Received:** September 5, 2015

**Accepted:** October 8, 2015

**Published:** November 9, 2015

**Copyright:** © 2015 Xie et al. This is an open access article distributed under the terms of the [Creative Commons Attribution License](https://creativecommons.org/licenses/by/4.0/), which permits unrestricted use, distribution, and reproduction in any medium, provided the original author and source are credited.

**Data Availability Statement:** All relevant data are within the paper.

**Funding:** This research was funded by a grant from the Science and Technology Research Project of Department of Education of Heilongjiang Province (12541434), Heilongjiang Provincial Science and Technology Research Project (LC2012C03), National Science Foundation of China (81471805), Chinese Postdoctoral Science Foundation (2014 M551272), and Scientific Research Project of Educational Department of Heilongjiang Province (11531109) to KK. URL is <http://www.nsf.gov.cn/>. The funders had

## Abstract

Aberrant proliferation and migration of vascular smooth muscle cells (VSMCs) play a crucial role in the pathogenesis of cardiovascular diseases including coronary heart disease, restenosis and atherosclerosis. MicroRNAs are a class of small, non-coding and endogenous RNAs that play critical roles in VSMCs function. In this study, we showed that PDGF-bb, as a stimulant, promoted VSMCs proliferation and suppressed the expression of miR-599. Moreover, overexpression of miR-599 inhibited VSMCs proliferation and also suppressed the PCNA and ki-67 expression. In addition, we demonstrated that ectopic expression of miR-599 repressed the VSMCs migration. We also showed that miR-599 inhibited type I collagen, type V collagen and proteoglycan expression. Furthermore, we identified TGFB2 as a direct target gene of miR-599 in VSMCs. Overexpression of TGFB2 reversed miR-599-induced inhibition of VSMCs proliferation and type I collagen, type V collagen and proteoglycan expression. In conclusion, our findings suggest miR-599 plays a crucial role in controlling VSMCs proliferation and matrix gene expression by regulating TGFB2 expression.

## Introduction

Cardiovascular diseases are a major cause of death worldwide and they include atherosclerosis, coronary artery disease (CAD), stroke, congestive heart failure, hypertension, myocardial infarction (MI) [1–4]. It is accepted that abnormal proliferation of vascular smooth muscle cells (VSMCs) is a critical event in the development of cardiovascular diseases [5–7]. However, their detail molecular mechanisms have not been fully illuminated.

MicroRNAs (miRNAs) are a class of small (18–24 nucleotides) non-coding and endogenous RNAs that modulate gene expression through binding to 3'UTR (3' untranslated regions) of target mRNAs to lead to protein translational repression [8–12]. A lot of studies have demonstrated that miRNAs are involved in various cellular processes including cell development, growth, survival, differentiation, proliferation and apoptosis [13–16]. Increasing evidences also find that deregulated expression of miRNA is implicated in many cancers such as gastric

no role in study design, data collection and analysis, decision to publish, or preparation of the manuscript.

**Competing Interests:** The authors have declared that no competing interests exist.

cancer, osteosarcoma, hepatocellular carcinoma, lung cancer and colorectal cancer [17–22]. Recently, many evidences have also proved that miRNAs play critical role in the VSMCs function [23]. For example, Torella et al. demonstrated that miR-133 played important roles in VSMCs phenotypic switch in vivo and in vitro [24]. Wang et al. showed that miR-31 expression was increased in quiescent differentiated VSMCs and decreased in proliferative cells treated by serum starvation and platelet-derived growth factor [25]. Li et al. reported that miR-638 was a key molecule in regulating human VSMC proliferation and migration by targeting the NOR1/cyclin D pathway [26]. However, functions of miRNAs in VSMC are still less explored.

Otaegui et al. showed that miR-599 in peripheral blood mononuclear cell may be relevant at the time of relapse in multiple sclerosis patients [27]. Wojcicka et al [28]. showed that four microRNAs (miR-425, miR-155, miR-599 and miR-592) potentially targeted THRB transcript. However, the role of miR-599 in VSMCs was still unknown. In this study, we showed that PDGF-bb, as a stimulant, promoted VSMCs proliferation and suppressed the expression of miR-599. Moreover, overexpression of miR-599 inhibited VSMCs proliferation and also suppressed the PCNA and ki-67 expression. In addition, we demonstrated that ectopic expression of miR-599 repressed the VSMCs migration. We also showed that miR-599 inhibited type I collagen, type V collagen and proteoglycan expression. Furthermore, we identified TGF $\beta$ 2 as a direct target gene of miR-599 in VSMCs. Overexpression of TGF $\beta$ 2 reversed miR-599 induced inhibition of VSMCs proliferation and type I collagen, type V collagen and proteoglycan expression.

## Materials and Methods

### Ethics Statement

The protocol for our study was approved by the Ethical Committee of the Second Affiliated Hospital of Harbin Medical University.

### Cells Culture and Oligonucleotide Transfection

The VSMCs cell line was purchased from Cascade Biologics (Portland, OR) and kept in DMEM/F12 medium (Dulbecco's modified Eagle's medium; Invitrogen, Carlsbad, CA). miR-599 and scramble oligonucleotide was purchased from GenePharma (Shanghai, China) and transfected into the VSMCs used Lipofectamine 2000 (Invitrogen, Carlsbad, CA) according to the manufacturer's information.

### qRT-PCR

Total RNA of the cell was extracted by using TRIzol reagent (Invitrogen, CA) following to the manufacturer's information. The expression of miR-599 and TGFB2 was detected using qRT-PCR according to standard protocol on the Bio-Rad PCR system (Bio-Rad, CA). U6 snRNA was used as the control for miR-599 expression and GAPDH was used as the control. The primer sequence was shown as follows: miR-599 sense, 5' -GUUGUGUCAGUUUAUCAAC-3'; antisense, 5' -CTCCATATCGCACTTTAATCTCTAACT-3'; GAPDH sense, 5' -GCA CCGTCAAGGCTGAGAAC-3'; and GAPDH antisense, 5' -TGGTGAAGACGCCAGTGGA-3'.

### Luciferase Reporter Assay

Cells at about 75% confluences were transfected with the TGFB2 3' UTR luciferase reporter vector and MUT TGFB2 3' UTR vector. Luciferase activities were detected using a Dual-

Luciferase Assay System (Promega, China) at 48 h post transfection. Luciferase data was normalized as Renilla luciferase activity.

## Cell Proliferation and Migration

Cells were transfected with miR-599 mimics or scramble or co-transfected with miR-599 mimics and TGFB2 vector, respectively. Cell Counting kit 8 (CCK8, Dojindo, USA) was used to detect the cell proliferation following to the manufacture's information. Wound-healing assay was performed to measure cell migration. A sterile plastic tip was used to scratch the cell layer when cell was reached 90% confluency. Photographic images were taken under a microscope at different time points.

## Western Blotting

Protein extraction was used RIPA lysis buffer (Beyotime Biotech, China). Protein lysates were separated by 10%SDS-PAGE (sodium dodecyl sulfate-polyacrylamide gel electrophoresis) and then transferred to polyvinylidene difluoride membrane (PVDF, Millipore, USA). Membrane was blocked with 5% bovine serum albumin, followed by incubation with primary antibody: type I collagen, type V collagen (dilutions 1: 2000, Sigma, USA) and proteoglycan (dilutions 1: 1000, Abcam, USA) and TGFb2 (dilutions 1: 2000, Abcam, USA). Membranes then incubated with HRP conjugated secondary antibody and the signal was measured using the ECL plus Kit (Pierce, USA).

## Statistics Analysis

Results were displayed as mean  $\pm$  SD. The significance between two groups was used Student's t test. The significance between more than two groups was used One-way ANOVA.  $P < 0.05$  was indicated as significant.

## Result

### miR-599 Is Inhibited by PDGF-bb in VSMCs

As shown in the [Fig 1A](#), PDGF-bb induced VSMCs proliferation in a time-dependent and dose-dependent manner ([Fig 1B](#)). Moreover, miR-599 was downregulated after PDGF-bb treatment ([Fig 1C and 1D](#)).

### miR-599 Suppressed VSMCs Proliferation and Migration

As shown in the [Fig 2A](#), the expression of miR-599 was increased in VSMCs after transfection of miR-599 mimic. Ectopic expression of miR-599 suppressed the VSMCs proliferation ([Fig 2B](#)). We also found that overexpression of miR-599 inhibited the mRNA and protein expression of PCNA in VSMCs ([Fig 2C and 2D](#)). Moreover, ectopic expression of miR-599 suppressed the mRNA and protein expression of ki-67 in VSMCs ([Fig 2E and 2F](#)) ([S1 Fig](#)). In addition, we showed that ectopic expression of miR-599 inhibited VSMCs migration ([Fig 3](#)).

### miR-599 Inhibited Matrix Gene Expression in VSMCs

Overexpression of miR-599 suppressed the type I collagen mRNA and protein expression ([Fig 4A and 4B](#)). In addition, miR-599 overexpression inhibited the mRNA and protein expression of type V collagen ([Fig 4C and 4D](#)). Moreover, ectopic expression of miR-599 inhibited proteoglycan mRNA and protein expression ([Fig 4E and 4F](#)) ([S2 Fig](#)).

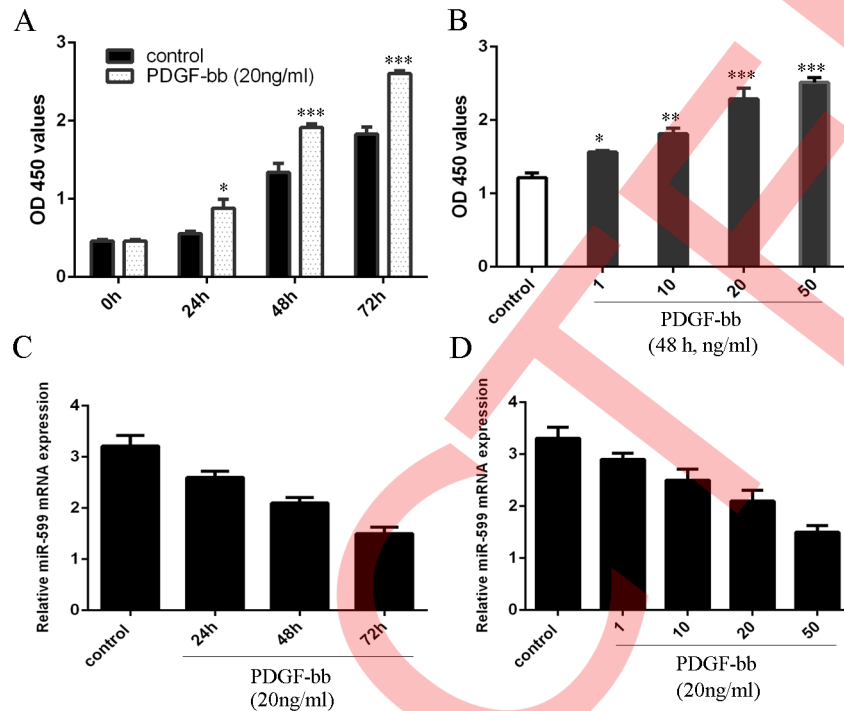

**Fig 1. miR-599 is inhibited by PDGF-bb in VSMCs.** (A) PDGF-bb can induce VSMCs proliferation at time-dependently. (B) PDGF-bb can induce VSMCs proliferation at dose-dependently. (C) The expression of miR-599 was measured by qRT-PCR. (D) The expression of miR-599 was measured by qRT-PCR. \* $p < 0.05$ , \*\* $p < 0.01$  and \*\*\* $p < 0.001$ .

doi:10.1371/journal.pone.0141512.g001

### TGFb2 Is a Direct Target of miR-599 in VSMCs

TargetScan algorithms found that there was a potential seed sequence of miR-599 in the 3' UTR of TGFb2 (Fig 5A). We demonstrated that miR-599 inhibited the luciferase activity in the TGFb2 with wild-type 3' UTR, whereas, luciferase activity was not drop in the mutant binding sites 3'UTR of TGFb2 (Fig 5B). Overexpression of miR-599 suppressed the protein expression of TGFb2 (Fig 5C) (S3 Fig).

### TGFb2 Involved in the Effect of miR-599 in VSMCs

Western blot showed that the plasmid of TGFb2 promoted the TGFb2 protein expression (Fig 6A). CCK8 analysis demonstrated that overexpression of TGFb2 promoted miR-599-induced inhibition of VSMCs proliferation (Fig 6B). Moreover, ectopic expression of TGFb2 promoted the expression of type I collagen, type V collagen and proteoglycan in miR-599 overexpressing VSMCs (Fig 6B, 6C and 6D) (S4 Fig).

### Discussion

In this study, we showed that PDGF-bb, as a stimulant, promoted VSMCs proliferation and suppressed the expression of miR-599. Moreover, overexpression of miR-599 inhibited VSMCs proliferation and also suppressed the PCNA and ki-67 expression. In addition, we demonstrated that ectopic expression of miR-599 repressed the VSMCs migration. We also showed that miR-599 inhibited type I collagen, type V collagen and proteoglycan expression. Furthermore, we identified TGFb2 as a direct target gene of miR-599 in VSMCs and overexpression of TGFb2 reversed miR-599 induced inhibition of VSMCs proliferation and type I collagen, type

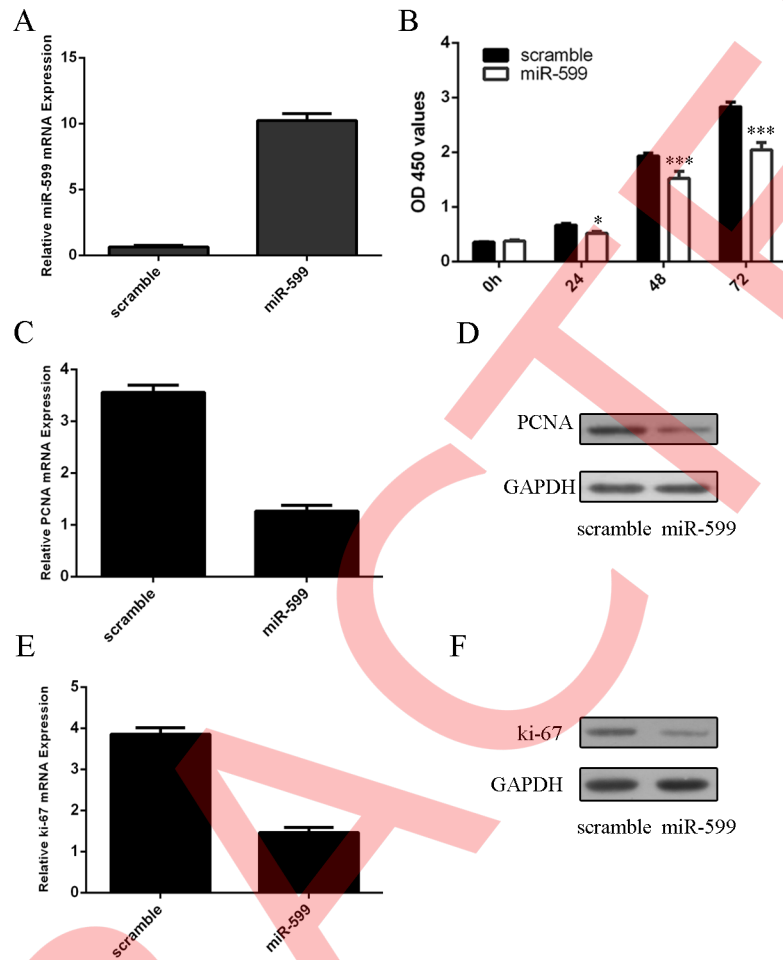

**Fig 2. miR-599 suppressed VSMCs proliferation.** (A) The expression of miR-599 was measured by qRT-PCR. (B) CCK-8 analysis showed that overexpression of miR-599 suppressed VSMCs proliferation. (C) The mRNA expression of PCNA in VSMCs was measured by qRT-PCR. (D) The protein expression of PCNA in VSMCs was measured by western blot. (E) The mRNA expression of ki-67 in VSMCs was measured by qRT-PCR. (F) The protein expression of ki-67 in VSMCs was measured by western blot. \* $p < 0.05$  and \*\*\* $p < 0.001$ .

doi:10.1371/journal.pone.0141512.g002

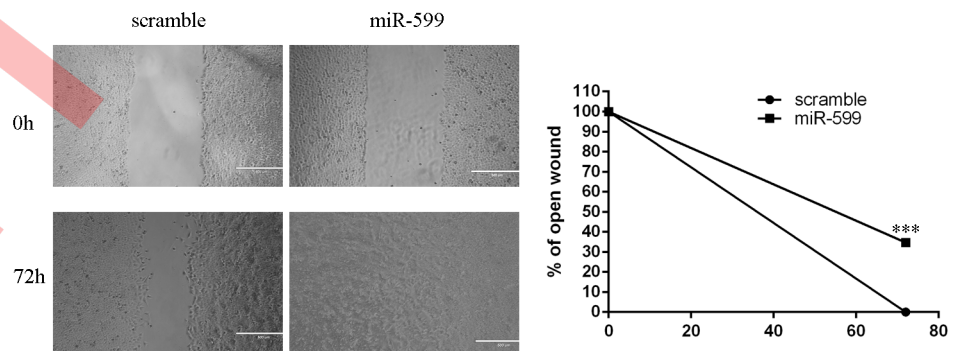

**Fig 3. miR-599 suppressed VSMCs migration.** Overexpression of miR-599 suppressed VSMCs migration. \*\*\* $p < 0.001$ .

doi:10.1371/journal.pone.0141512.g003

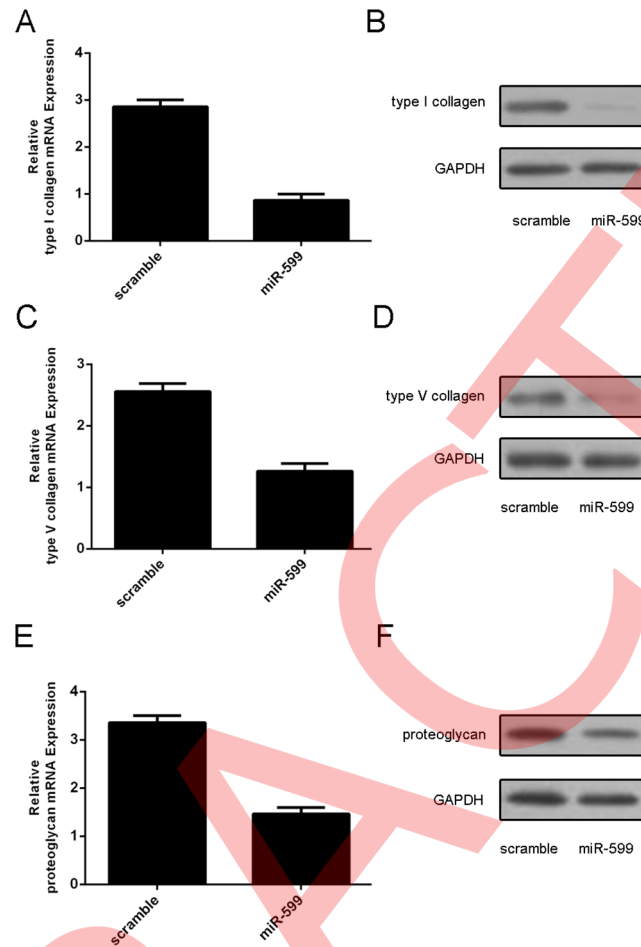

**Fig 4. miR-599 inhibited matrix gene expression in VSMCs.** (A) Overexpression of miR-599 suppressed the type I collagen mRNA expression. (B) The protein expression of type I collagen in VSMCs was measure by western blot. (C) Overexpression of miR-599 suppressed the type V collagen mRNA expression. (D) The protein expression of type V collagen in VSMCs was measure by western blot. (E) Overexpression of miR-599 suppressed the proteoglycan mRNA expression. (D) The protein expression of proteoglycan in VSMCs was measure by western blot.

doi:10.1371/journal.pone.0141512.g004

V collagen and proteoglycan expression. Above findings suggest miR-599 plays a crucial role in controlling VSMCs proliferation and matrix gene expression.

Aberrant VSMCs proliferation and migration were associated with the development of cardiovascular diseases such as restenosis and atherosclerosis [26, 29, 30]. Accumulating studies indicated that miRNAs play an important role in a lot of cellular processes including cell differentiation, proliferation, epithelial—mesenchymal transition, migration and invasion [31–34]. Otaegui et al. showed that miR-599 in peripheral blood mononuclear cell may be relevant at the time of relapse in multiple sclerosis patients [27]. Wojcicka et al [28]. showed that four microRNAs (miR-425, miR-155, miR-599 and miR -592) potentially targeted THRB transcript. However, the role of miR-599 in VSMCs was still unknown. In our study, we confirmed that miR-599 was decreased in proliferative VSMCs induced by PDGF-bb. Overexpression of miR-599 suppressed VSMCs proliferation and migration and also inhibited the PCNA and ki-67 expression. We also showed that miR-599 inhibited type I collagen, type V collagen and proteoglycan expression.

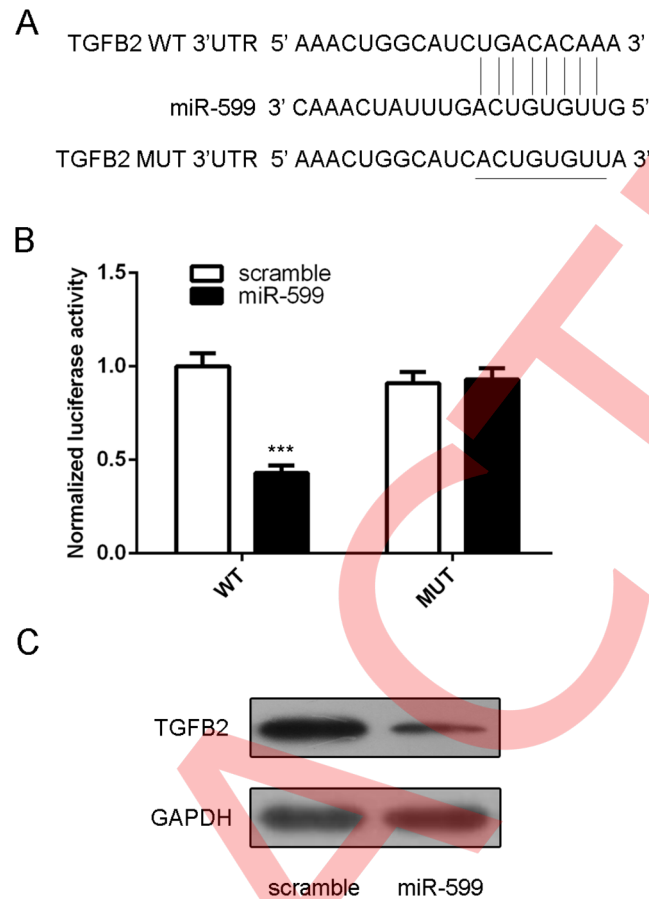

**Fig 5. TGFB2 is a direct target of miR-599 in VSMCs.** (A) There is a potential seed sequence of miR-599 in the 3' UTR of TGFB2. (B) miR-599 inhibited the luciferase activity in the TGFB2 with wild-type 3' UTR, whereas, luciferase activity was not drop in the mutant binding sites 3' UTR of TGFB2. (C) Overexpression of miR-599 suppressed the protein expression of TGFB2. \*\*\* $p < 0.001$ .

doi:10.1371/journal.pone.0141512.g005

TGF- $\beta$  pathway plays an important role in many cellular processes such as cell differentiation, proliferation, extracellular matrix accumulation, tissue repair, inflammatory responses and immune [35–39]. TGF- $\beta$  has three isoforms including TGF- $\beta$ 1, TGF- $\beta$ 2 and TGF- $\beta$ 3 in mammals [40]. Previous studies proved that TGF- $\beta$  acted as important roles in the development in cardiovascular diseases such as atherosclerosis and restenosis [40, 41]. TGF- $\beta$  stimulates cell proliferation and invasion, synthesis of extracellular matrix proteins and proteoglycans in VSMCs [41, 42]. In this study, we demonstrated that miR-599 acted as an important regulator by targeting TGF- $\beta$ 2 in VSMCs. TargetScan algorithms demonstrated there was a potential seed sequence of miR-599 in the 3' UTR of TGFB2. We further confirmed that miR-599 directly bound the 3' UTR regions of TGFB2. Moreover, overexpression of miR-599 suppressed the expression of TGFB2 in VSMCs. Furthermore, overexpression of TGFB2 reversed miR-599 induced inhibition of VSMCs proliferation and type I collagen, type V collagen and proteoglycan expression.

In conclusion, we initially demonstrated that the expression of miR-599 was decreased in proliferating VSMCs treated by PDGF- $\beta$ . Overexpression of miR-599 suppressed VSMCs proliferation and migration and inhibited the PCNA and ki-67 expression. We also showed that miR-599 inhibited type I collagen, type V collagen and proteoglycan expression.

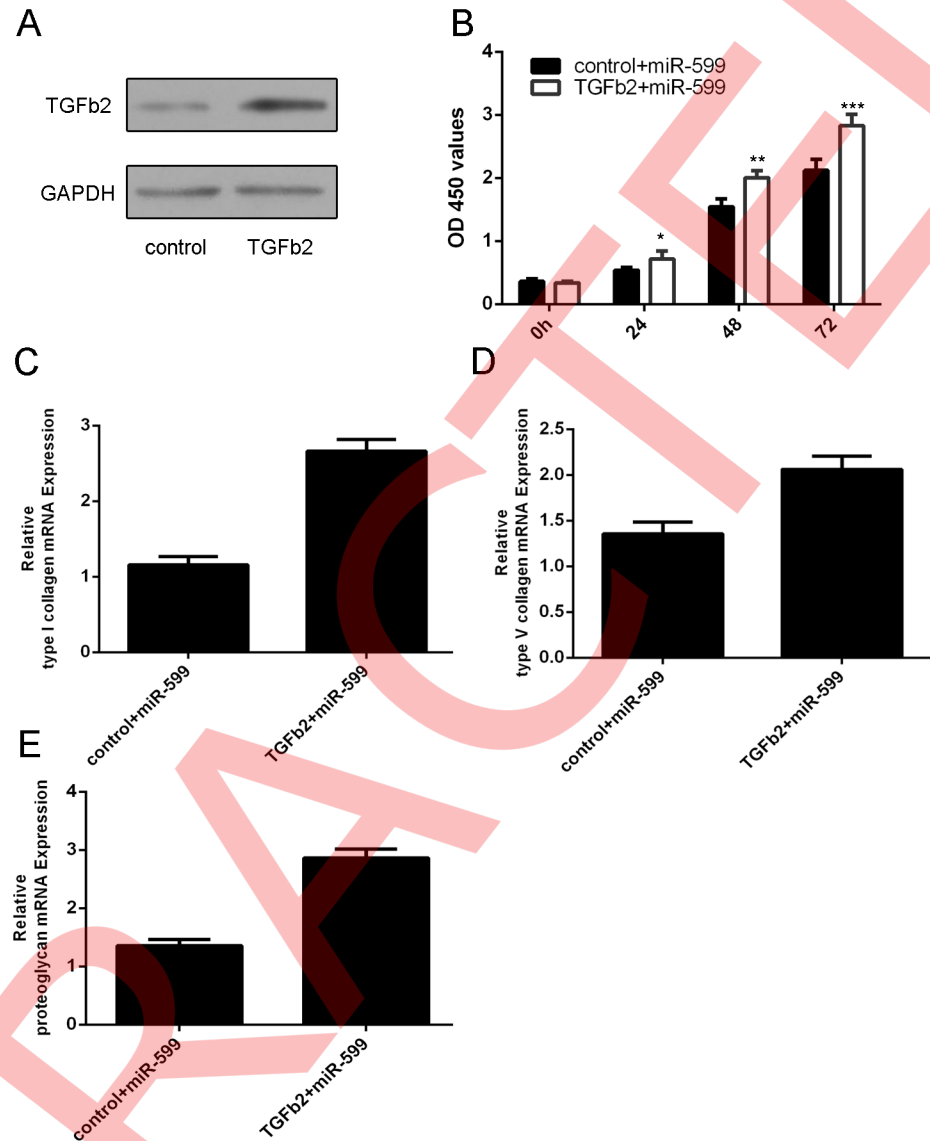

**Fig 6. TGFb2 involved in the effect of miR-599 in VSMCs.** (A) The protein expression of TGFb2 was measured by western blot. (B) Overexpression of TGFb2 promoted miR-599-induced inhibition of VSMCs proliferation. (C) Ectopic expression of TGFb2 promoted the expression of type I collagen, in miR-599 overexpressing VSMCs. (D) The mRNA expression of type V collagen in VSMCs was measure by qRT-PCR. (E) The mRNA expression of proteoglycan in VSMCs was measure by qRT-PCR. \* $p < 0.05$ , \*\* $p < 0.01$  and \*\*\* $p < 0.001$ .

doi:10.1371/journal.pone.0141512.g006

Furthermore, we identified TGFb2 as a direct target gene of miR-599 in VSMCs and overexpression of TGFb2 reversed miR-599 induced inhibition of VSMCs proliferation and type I collagen, type V collagen and proteoglycan. These findings suggest miR-599 plays a crucial role in controlling VSMCs proliferation and matrix gene expression by regulating TGFb2 expression.

### Supporting Information

**S1 Fig. The protein expression of PCNA and ki-67 was shown.**  
(TIF)



**S2 Fig. The protein expression of type I collagen, type V collagen and proteoglycan was shown.**

(TIF)

**S3 Fig. The protein expression of TGFb2 was shown.**

(TIF)

**S4 Fig. The protein expression of TGFb2 was measured by Western blot analysis after treated with plasmid of TGFb2.**

(TIF)

## Author Contributions

Conceived and designed the experiments: BX CZ KK SJ. Performed the experiments: BX CZ KK SJ. Analyzed the data: BX CZ KK SJ. Contributed reagents/materials/analysis tools: BX CZ KK SJ. Wrote the paper: BX CZ KK SJ.

## References

1. Ma S, Ma CC. Recent development in pleiotropic effects of statins on cardiovascular disease through regulation of transforming growth factor-beta superfamily. *Cytokine & growth factor reviews*. 2011; 22(3):167–75. Epub 2011/06/28. doi: [10.1016/j.cytogfr.2011.05.004](https://doi.org/10.1016/j.cytogfr.2011.05.004) PMID: [21700485](https://pubmed.ncbi.nlm.nih.gov/21700485/).
2. Small EM, Olson EN. Pervasive roles of microRNAs in cardiovascular biology. *Nature*. 2011; 469(7330):336–42. Epub 2011/01/21. doi: [10.1038/nature09783](https://doi.org/10.1038/nature09783) PMID: [21248840](https://pubmed.ncbi.nlm.nih.gov/21248840/); PubMed Central PMCID: [PMC3073349](https://pubmed.ncbi.nlm.nih.gov/PMC3073349/).
3. Han M, Toli J, Abdellatif M. MicroRNAs in the cardiovascular system. *Current opinion in cardiology*. 2011; 26(3):181–9. Epub 2011/04/06. doi: [10.1097/HCO.0b013e328345983d](https://doi.org/10.1097/HCO.0b013e328345983d) PMID: [21464712](https://pubmed.ncbi.nlm.nih.gov/21464712/).
4. Hou N, Luo JD. Leptin and cardiovascular diseases. *Clinical and experimental pharmacology & physiology*. 2011; 38(12):905–13. Epub 2011/10/01. doi: [10.1111/j.1440-1681.2011.05619.x](https://doi.org/10.1111/j.1440-1681.2011.05619.x) PMID: [21957899](https://pubmed.ncbi.nlm.nih.gov/21957899/).
5. Zhao J, Imbrie GA, Baur WE, Iyer LK, Aronovitz MJ, Kershaw TB, et al. Estrogen receptor-mediated regulation of microRNA inhibits proliferation of vascular smooth muscle cells. *Arteriosclerosis, thrombosis, and vascular biology*. 2013; 33(2):257–65. Epub 2012/11/24. doi: [10.1161/ATVBAHA.112.300200](https://doi.org/10.1161/ATVBAHA.112.300200) PMID: [23175673](https://pubmed.ncbi.nlm.nih.gov/23175673/); PubMed Central PMCID: [PMC3780598](https://pubmed.ncbi.nlm.nih.gov/PMC3780598/).
6. Song L, Duan P, Guo P, Li D, Li S, Xu Y, et al. Downregulation of miR-223 and miR-153 mediates mechanical stretch-stimulated proliferation of venous smooth muscle cells via activation of the insulin-like growth factor-1 receptor. *Archives of biochemistry and biophysics*. 2012; 528(2):204–11. Epub 2012/10/11. doi: [10.1016/j.abb.2012.08.015](https://doi.org/10.1016/j.abb.2012.08.015) PMID: [23046980](https://pubmed.ncbi.nlm.nih.gov/23046980/).
7. Zhang Y, Wang Y, Wang X, Eisner GM, Asico LD, Jose PA, et al. Insulin promotes vascular smooth muscle cell proliferation via microRNA-208-mediated downregulation of p21. *Journal of hypertension*. 2011; 29(8):1560–8. Epub 2011/07/02. doi: [10.1097/HJH.0b013e328348ef8e](https://doi.org/10.1097/HJH.0b013e328348ef8e) PMID: [21720271](https://pubmed.ncbi.nlm.nih.gov/21720271/).
8. Yu X, Li Z. The role of MicroRNAs expression in laryngeal cancer. *Oncotarget*. 2015. Epub 2015/06/17.
9. Li Z, Yu X, Shen J, Jiang Y. MicroRNA dysregulation in uveal melanoma: a new player enters the game. *Oncotarget*. 2015. Epub 2015/02/17. PMID: [25682876](https://pubmed.ncbi.nlm.nih.gov/25682876/).
10. Li Z, Yu X, Shen J, Wu WK, Chan MT. MicroRNA expression and its clinical implications in Ewing's sarcoma. *Cell proliferation*. 2015; 48(1):1–6. Epub 2014/12/23. doi: [10.1111/cpr.12160](https://doi.org/10.1111/cpr.12160) PMID: [25530497](https://pubmed.ncbi.nlm.nih.gov/25530497/).
11. Yu X, Li Z, Shen J, Wu WK, Liang J, Weng X, et al. MicroRNA-10b Promotes Nucleus Pulposus Cell Proliferation through RhoC-Akt Pathway by Targeting HOXD10 in Intervertebral Disc Degeneration. *PloS one*. 2013; 8(12):e83080. Epub 2014/01/01. doi: [10.1371/journal.pone.0083080](https://doi.org/10.1371/journal.pone.0083080) PMID: [24376640](https://pubmed.ncbi.nlm.nih.gov/24376640/); PubMed Central PMCID: [PMC3869743](https://pubmed.ncbi.nlm.nih.gov/PMC3869743/).
12. Vrba L, Munoz-Rodriguez JL, Stampfer MR, Futscher BW. miRNA gene promoters are frequent targets of aberrant DNA methylation in human breast cancer. *PloS one*. 2013; 8(1):e54398. Epub 2013/01/24. doi: [10.1371/journal.pone.0054398](https://doi.org/10.1371/journal.pone.0054398) PMID: [23342147](https://pubmed.ncbi.nlm.nih.gov/23342147/); PubMed Central PMCID: [PMC3547033](https://pubmed.ncbi.nlm.nih.gov/PMC3547033/).
13. Li Z, Yu X, Shen J, Chan MT, Wu WK. MicroRNA in intervertebral disc degeneration. *Cell proliferation*. 2015; 48(3):278–83. Epub 2015/03/05. doi: [10.1111/cpr.12180](https://doi.org/10.1111/cpr.12180) PMID: [25736871](https://pubmed.ncbi.nlm.nih.gov/25736871/).
14. Yu X, Li Z, Liu J. MiRNAs in primary cutaneous lymphomas. *Cell proliferation*. 2015; 48(3):271–7. Epub 2015/03/05. doi: [10.1111/cpr.12179](https://doi.org/10.1111/cpr.12179) PMID: [25736784](https://pubmed.ncbi.nlm.nih.gov/25736784/).

15. Li Z, Yu X, Shen J, Law PT, Chan MT, Wu WK. MicroRNA expression and its implications for diagnosis and therapy of gallbladder cancer. *Oncotarget*. 2015; 6(16):13914–24. Epub 2015/06/04. PMID: [26040010](#).
16. Karnuth B, Dedy N, Spieker T, Lawlor ER, Gattenlohner S, Ranft A, et al. Differentially expressed miRNAs in Ewing sarcoma compared to mesenchymal stem cells: low miR-31 expression with effects on proliferation and invasion. *PloS one*. 2014; 9(3):e93067. Epub 2014/03/29. doi: [10.1371/journal.pone.0093067](#) PMID: [24667836](#); PubMed Central PMCID: PMC3965523.
17. Li Z, Lei H, Luo M, Wang Y, Dong L, Ma Y, et al. DNA methylation downregulated mir-10b acts as a tumor suppressor in gastric cancer. *Gastric cancer: official journal of the International Gastric Cancer Association and the Japanese Gastric Cancer Association*. 2015; 18(1):43–54. Epub 2014/02/01. doi: [10.1007/s10120-014-0340-8](#) PMID: [24481854](#).
18. Li Z, Yu X, Wang Y, Shen J, Wu WK, Liang J, et al. By downregulating TIAM1 expression, microRNA-329 suppresses gastric cancer invasion and growth. *Oncotarget*. 2015; 6(19):17559–69. Epub 2015/02/06. PMID: [25654811](#).
19. Murakami Y, Tanahashi T, Okada R, Toyoda H, Kumada T, Enomoto M, et al. Comparison of Hepatocellular Carcinoma miRNA Expression Profiling as Evaluated by Next Generation Sequencing and Microarray. *PloS one*. 2014; 9(9):e106314. Epub 2014/09/13. doi: [10.1371/journal.pone.0106314](#) PMID: [25215888](#); PubMed Central PMCID: PMC4162537.
20. Sabarinathan R, Wenzel A, Novotny P, Tang X, Kalari KR, Gorodkin J. Transcriptome-wide analysis of UTRs in non-small cell lung cancer reveals cancer-related genes with SNV-induced changes on RNA secondary structure and miRNA target sites. *PloS one*. 2014; 9(1):e82699. Epub 2014/01/15. doi: [10.1371/journal.pone.0082699](#) PMID: [24416147](#); PubMed Central PMCID: PMC3885406.
21. Piepoli A, Tavano F, Copetti M, Mazza T, Palumbo O, Panza A, et al. Mirna expression profiles identify drivers in colorectal and pancreatic cancers. *PloS one*. 2012; 7(3):e33663. Epub 2012/04/06. doi: [10.1371/journal.pone.0033663](#) PMID: [22479426](#); PubMed Central PMCID: PMC3316496.
22. Wang J, Xu G, Shen F, Kang Y. miR-132 targeting cyclin E1 suppresses cell proliferation in osteosarcoma cells. *Tumour biology: the journal of the International Society for Oncodevelopmental Biology and Medicine*. 2014; 35(5):4859–65. Epub 2014/01/23. doi: [10.1007/s13277-014-1637-2](#) PMID: [24449507](#).
23. Yu X, Li Z. MicroRNAs regulate vascular smooth muscle cell functions in atherosclerosis (review). *International journal of molecular medicine*. 2014; 34(4):923–33. Epub 2014/09/10. doi: [10.3892/ijmm.2014.1853](#) PMID: [25197940](#).
24. Torella D, Iaconetti C, Catalucci D, Ellison GM, Leone A, Waring CD, et al. MicroRNA-133 controls vascular smooth muscle cell phenotypic switch in vitro and vascular remodeling in vivo. *Circulation research*. 2011; 109(8):880–93. Epub 2011/08/20. doi: [10.1161/CIRCRESAHA.111.240150](#) PMID: [21852550](#).
25. Wang J, Yan CH, Li Y, Xu K, Tian XX, Peng CF, et al. MicroRNA-31 controls phenotypic modulation of human vascular smooth muscle cells by regulating its target gene cellular repressor of E1A-stimulated genes. *Experimental cell research*. 2013; 319(8):1165–75. Epub 2013/03/23. doi: [10.1016/j.yexcr.2013.03.010](#) PMID: [23518389](#).
26. Li P, Liu Y, Yi B, Wang G, You X, Zhao X, et al. MicroRNA-638 is highly expressed in human vascular smooth muscle cells and inhibits PDGF-BB-induced cell proliferation and migration through targeting orphan nuclear receptor NOR1. *Cardiovascular research*. 2013; 99(1):185–93. Epub 2013/04/05. doi: [10.1093/cvr/cvt082](#) PMID: [23554459](#); PubMed Central PMCID: PMC3687750.
27. Otaegui D, Baranzini SE, Armananzas R, Calvo B, Munoz-Culla M, Khankhanian P, et al. Differential micro RNA expression in PBMC from multiple sclerosis patients. *PloS one*. 2009; 4(7):e6309. Epub 2009/07/21. doi: [10.1371/journal.pone.0006309](#) PMID: [19617918](#); PubMed Central PMCID: PMC2708922.
28. Wojcicka A, Piekielko-Witkowska A, Kedziarska H, Rybicka B, Poplawski P, Boguslawska J, et al. Epigenetic regulation of thyroid hormone receptor beta in renal cancer. *PloS one*. 2014; 9(5):e97624. Epub 2014/05/23. doi: [10.1371/journal.pone.0097624](#) PMID: [24849932](#); PubMed Central PMCID: PMC4029725.
29. Stein JJ, Iwchukwu C, Maier KG, Gahtan V. Thrombospondin-1-induced vascular smooth muscle cell migration and proliferation are functionally dependent on microRNA-21. *Surgery*. 2014; 155(2):228–33. Epub 2013/12/10. doi: [10.1016/j.surg.2013.08.003](#) PMID: [24314882](#).
30. Li P, Zhu N, Yi B, Wang N, Chen M, You X, et al. MicroRNA-663 regulates human vascular smooth muscle cell phenotypic switch and vascular neointimal formation. *Circulation research*. 2013; 113(10):1117–27. Epub 2013/09/10. doi: [10.1161/CIRCRESAHA.113.301306](#) PMID: [24014830](#).
31. Choe N, Kwon JS, Kim JR, Eom GH, Kim Y, Nam KI, et al. The microRNA miR-132 targets Lrrfip1 to block vascular smooth muscle cell proliferation and neointimal hyperplasia. *Atherosclerosis*. 2013; 229(2):348–55. Epub 2013/07/25. doi: [10.1016/j.atherosclerosis.2013.05.009](#) PMID: [23880186](#).

32. Wang YS, Wang HY, Liao YC, Tsai PC, Chen KC, Cheng HY, et al. MicroRNA-195 regulates vascular smooth muscle cell phenotype and prevents neointimal formation. *Cardiovascular research*. 2012; 95(4):517–26. Epub 2012/07/18. doi: [10.1093/cvr/cvs223](https://doi.org/10.1093/cvr/cvs223) PMID: [22802111](https://pubmed.ncbi.nlm.nih.gov/22802111/).
33. Xu X, Wang W, Su N, Zhu X, Yao J, Gao W, et al. miR-374a promotes cell proliferation, migration and invasion by targeting SRCIN1 in gastric cancer. *FEBS letters*. 2015; 589(3):407–13. Epub 2015/01/03. doi: [10.1016/j.febslet.2014.12.027](https://doi.org/10.1016/j.febslet.2014.12.027) PMID: [25554419](https://pubmed.ncbi.nlm.nih.gov/25554419/).
34. Zhang Z, Liu S, Shi R, Zhao G. miR-27 promotes human gastric cancer cell metastasis by inducing epithelial-to-mesenchymal transition. *Cancer genetics*. 2011; 204(9):486–91. Epub 2011/10/25. doi: [10.1016/j.cancergen.2011.07.004](https://doi.org/10.1016/j.cancergen.2011.07.004) PMID: [22018270](https://pubmed.ncbi.nlm.nih.gov/22018270/).
35. Kitamura K, Seike M, Okano T, Matsuda K, Miyanaga A, Mizutani H, et al. MiR-134/487b/655 cluster regulates TGF-beta-induced epithelial-mesenchymal transition and drug resistance to gefitinib by targeting MAGI2 in lung adenocarcinoma cells. *Molecular cancer therapeutics*. 2014; 13(2):444–53. Epub 2013/11/22. doi: [10.1158/1535-7163.MCT-13-0448](https://doi.org/10.1158/1535-7163.MCT-13-0448) PMID: [24258346](https://pubmed.ncbi.nlm.nih.gov/24258346/).
36. Qiu Y, Luo X, Kan T, Zhang Y, Yu W, Wei Y, et al. TGF-beta upregulates miR-182 expression to promote gallbladder cancer metastasis by targeting CADM1. *Molecular bioSystems*. 2014; 10(3):679–85. Epub 2014/01/22. doi: [10.1039/c3mb70479c](https://doi.org/10.1039/c3mb70479c) PMID: [24445397](https://pubmed.ncbi.nlm.nih.gov/24445397/).
37. Cesi V, Casciati A, Sesti F, Tanno B, Calabretta B, Raschella G. TGFbeta-induced c-Myb affects the expression of EMT-associated genes and promotes invasion of ER+ breast cancer cells. *Cell Cycle*. 2011; 10(23):4149–61. Epub 2011/11/22. doi: [10.4161/cc.10.23.18346](https://doi.org/10.4161/cc.10.23.18346) PMID: [22101269](https://pubmed.ncbi.nlm.nih.gov/22101269/).
38. Chen J, Chen G, Yan Z, Guo Y, Yu M, Feng L, et al. TGF-beta1 and FGF2 stimulate the epithelial-mesenchymal transition of HERS cells through a MEK-dependent mechanism. *Journal of cellular physiology*. 2014; 229(11):1647–59. Epub 2014/03/13. doi: [10.1002/jcp.24610](https://doi.org/10.1002/jcp.24610) PMID: [24610459](https://pubmed.ncbi.nlm.nih.gov/24610459/).
39. Lyu X, Fang W, Cai L, Zheng H, Ye Y, Zhang L, et al. TGFbetaR2 is a major target of miR-93 in nasopharyngeal carcinoma aggressiveness. *Molecular cancer*. 2014; 13:51. Epub 2014/03/13. doi: [10.1186/1476-4598-13-51](https://doi.org/10.1186/1476-4598-13-51) PMID: [24606633](https://pubmed.ncbi.nlm.nih.gov/24606633/); PubMed Central PMCID: [PMC4016586](https://pubmed.ncbi.nlm.nih.gov/PMC4016586/).
40. Singh NN, Ramji DP. The role of transforming growth factor-beta in atherosclerosis. *Cytokine & growth factor reviews*. 2006; 17(6):487–99. Epub 2006/10/24. doi: [10.1016/j.cytogfr.2006.09.002](https://doi.org/10.1016/j.cytogfr.2006.09.002) PMID: [17056295](https://pubmed.ncbi.nlm.nih.gov/17056295/).
41. Mallat Z, Tedgui A. The role of transforming growth factor beta in atherosclerosis: novel insights and future perspectives. *Current opinion in lipidology*. 2002; 13(5):523–9. Epub 2002/09/28. PMID: [12352016](https://pubmed.ncbi.nlm.nih.gov/12352016/).
42. Zhang H, Wang ZW, Wu HB, Li Z, Li LC, Hu XP, et al. Transforming growth factor-beta1 induces matrix metalloproteinase-9 expression in rat vascular smooth muscle cells via ROS-dependent ERK-NF-kappaB pathways. *Molecular and cellular biochemistry*. 2013; 375(1–2):11–21. Epub 2013/01/01. doi: [10.1007/s11010-012-1512-7](https://doi.org/10.1007/s11010-012-1512-7) PMID: [23275087](https://pubmed.ncbi.nlm.nih.gov/23275087/).
